# Supplementary material for: Synthetic Conditions for Obtaining Different Types of Amine-Holding Silica Particles and Their Sorption Behavior
Source: MDPI journal article supplement (doi:10.3390/cryst13020190), 2023-01-21
Supplement: s1 [file s1]

## Supplementary Materials

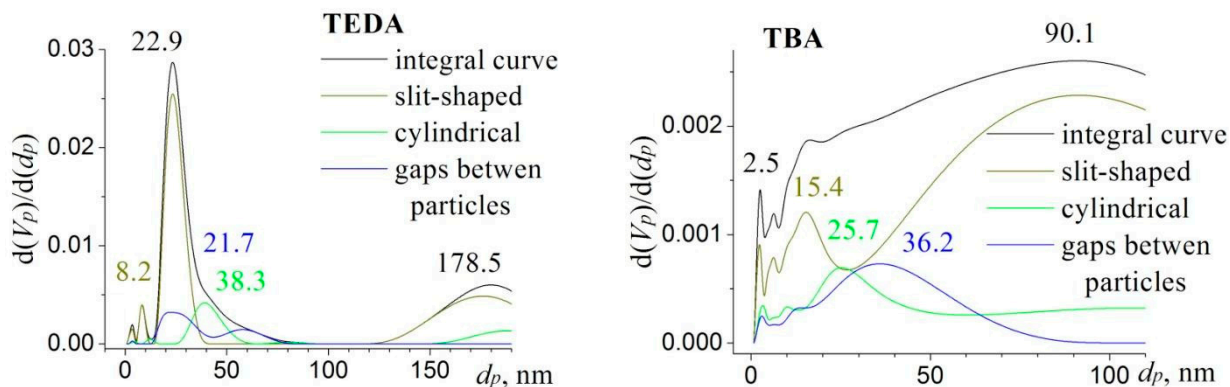

Figure S1. Pore-size distribution curves for the porous samples: **TEDA** and **TBA** plotted based on the SCV/SCR method.

The pore-size distributions were estimated and plotted based on the SCV/SCR method, which is a self-consistent regularization (SCR) procedure applied to integral adsorption equations based on a complex model (SCV model), with slit-shaped and cylindrical pores and voids between spherical nonporous particles packed in random aggregates. Thus, the SCV/SCR method covers the mixed pores (slit-like, cylindrical, and with gaps between spherical particles) [1].

Table S1. Structural and adsorption characteristics of the synthesised porous samples.

| Sample      | $S_{BET}$ ,<br>$m^2 g^{-1}$ | $V_{\Sigma}$ ,<br>$cm^3 g^{-1}$ | $V_{pores}$ , % |      |       | $V_{pores}$ , $cm^3 g^{-1}$ |          |       | $d_{ef}$ ,<br>nm |
|-------------|-----------------------------|---------------------------------|-----------------|------|-------|-----------------------------|----------|-------|------------------|
|             |                             |                                 | nano            | meso | macro | slits                       | cylinder | gaps  |                  |
| <b>TEDA</b> | 174                         | 0.78                            | 1.9             | 88.2 | 9.9   | 0.584                       | 0.085    | 0.115 | 18               |
| <b>TBA</b>  | 179                         | 0.29                            | 7.2             | 59.8 | 33    | 0.190                       | 0.056    | 0.046 | 6.5              |

Moreover, the Gurvich formula was used to calculate the pore diameter (nm):  $d_{ef} = 4V_{\Sigma}/S_{BET} * 1000$ , where  $V_{\Sigma}$  is adsorption pore volume ( $cm^3 g^{-1}$ ) estimated at the highest P/Ps of low-temperature nitrogen adsorption-desorption isotherms;  $S_{BET}$  is the specific surface area ( $m^2 g^{-1}$ ).

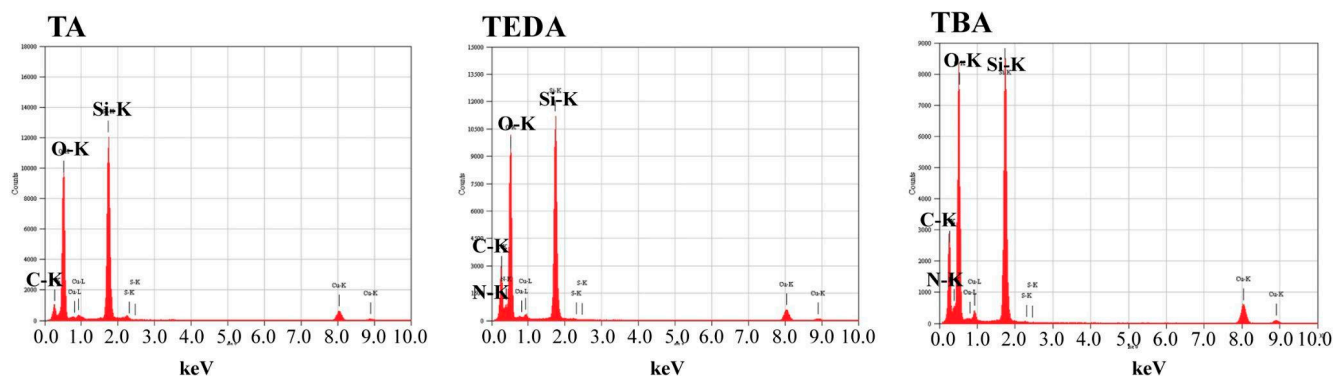

Figure S2. The EDX spectra of the synthesised samples

Table S2. Kinetic parameters of Cu(II) and Ni(II) ions adsorption by the **TEDA** sample

| <i>Kinetic sorption parameters for <b>TEDA</b></i>                    |                                             | Ni(II)       | Cu(II)       |
|-----------------------------------------------------------------------|---------------------------------------------|--------------|--------------|
| pseudo(I) order equation<br>$\ln (A_{eq} - A_t) = \ln A_{eq} - k_1 t$ | $A_{eq}, \text{ mmol g}^{-1}$               | 0.21         | 0.67         |
|                                                                       | $k_1, \text{ min}^{-1}$                     | 0.0134       | 0.0165       |
|                                                                       | $R^2$                                       | 0.979        | 0.962        |
| pseudo(II) order equation<br>$t/A_t = 1/(k_2 A_{eq}^2) + t/A_{eq}$    | $A_{eq}, \text{ mmol g}^{-1}$               | 0.32         | 0.85         |
|                                                                       | $k_2, \text{ g mmol}^{-1} \text{ min}^{-1}$ | 0.1091       | 0.0371       |
|                                                                       | $h, \text{ mmol min}^{-1} \text{ g}^{-1}$   | 0.011        | 0.027        |
|                                                                       | $R^2$                                       | <b>0.990</b> | <b>0.990</b> |

$A_t$  and  $A_{eq}$  stand for adsorption ( $\text{mmol g}^{-1}$ ) at any given time  $t$  (min) and at equilibrium;  $k_1$  ( $\text{min}^{-1}$ ) and  $k_2$  ( $\text{g mmol}^{-1} \text{ min}^{-1}$ ) are the rate constants of pseudo-first and pseudo-second order models. The initial rate of sorption  $h$  ( $\text{mmol min}^{-1} \text{ g}^{-1}$ ), in accordance with the pseudo-second order kinetic model, was calculated as:  $h = k_2 A_{eq}^2$

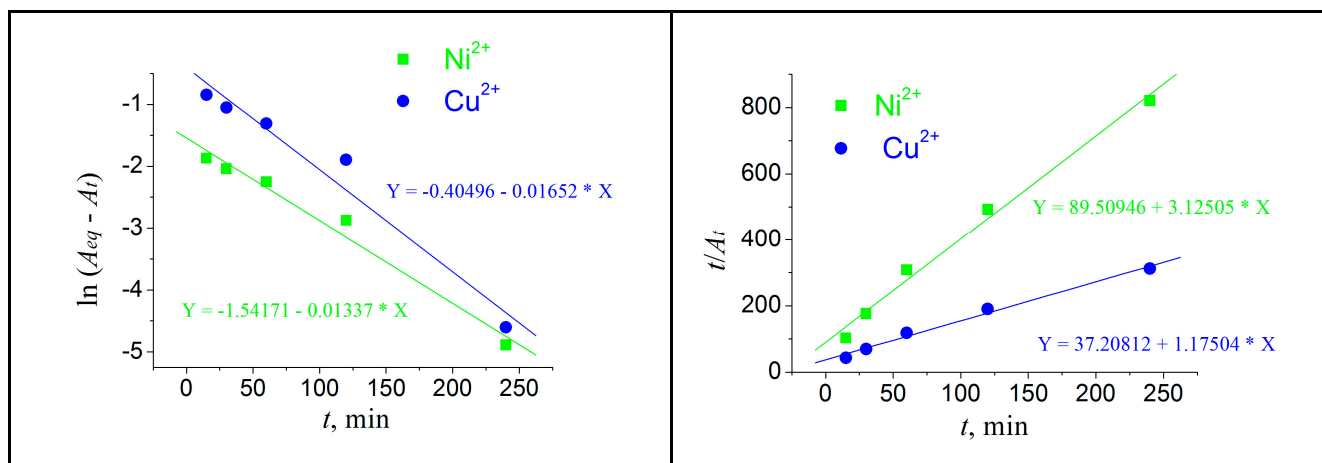

Figure S3. Kinetic curves of Ni(II) and Cu(II) sorption by **TEDA** silica in Lagergren equation coordinates for pseudo-first (left) and pseudo-second (right) order processes

## References:

- [1] Gun'ko, V.M. Composite materials: Textural characteristics. Applied Surface Science 2014, 307, 444-454. <https://doi.org/10.1016/j.apsusc.2014.04.055>
